# Supplementary material
Source: Springer Nature journal article supplement (https://www.springermedizin.de/resource/supplementary/12891_2011_1397_MOESM2_ESM.pdf/9508180)
Supplement: MOESM2 [file 9508180]

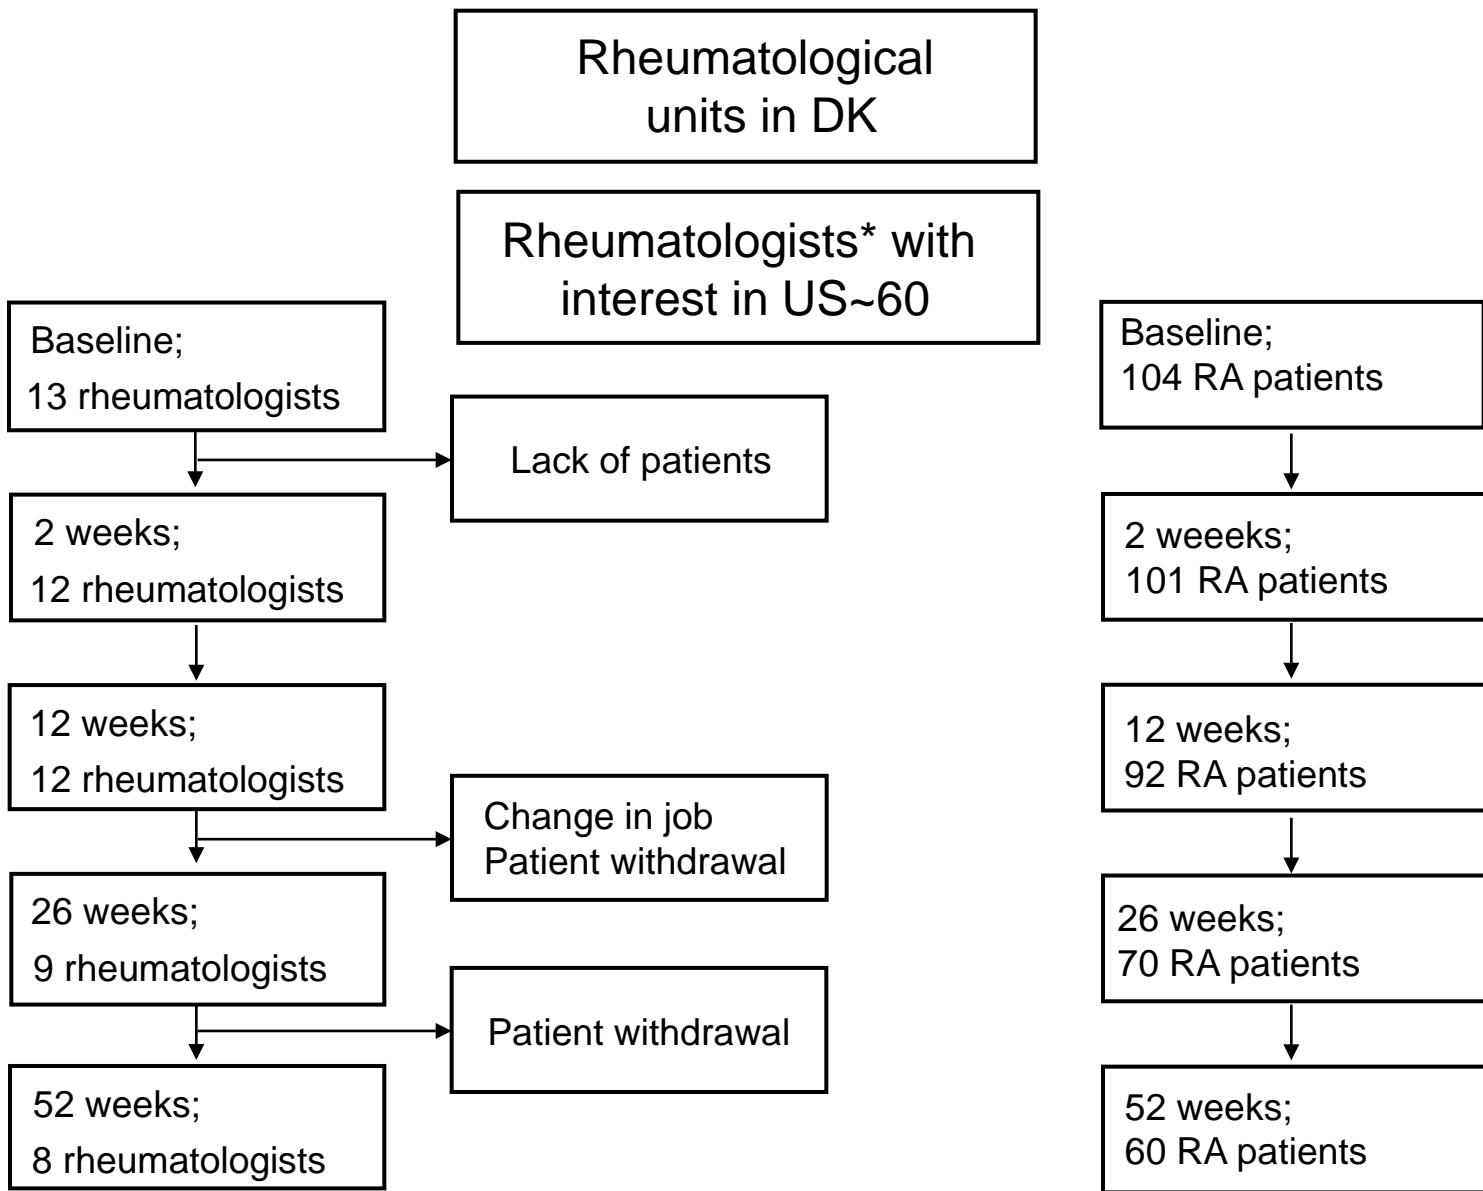

•Rheumatologists who have participated in two courses in musculoskeletal US approved by Danish US Diagnostic Society. (DUDS)
